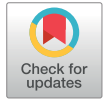

# Erratum

**Erratum. Increased Prevalence of Type 2 Diabetes–Related Complications in Combined Type 2 Diabetes and Sickle Cell Trait. *Diabetes Care* 2018;41:2595–2602**

<https://doi.org/10.2337/dc19-er03b>

In the article cited above, the first sentence in the Results section of the abstract had the name of the group incorrectly cited as “the SCT group.” This was corrected to read: Retinopathy, hypertension, and reduced renal function were more prevalent, and arterial stiffness, blood viscosity at high shear rates, and thixotropic index were higher, in the T2D-SCT group compared with the other groups.

The online version reflects this change.

*Sarah C. Skinner, Mor Diaw, Vincent Pialoux, Maimouna Ndour Mbaye, Pauline Mury, Philomène Lopez, Delphine Bousquet, Fatou Gueye, Demba Diedhiou, Philippe Joly, Céline Renoux, Djiby Sow, Saliou Diop, Brigitte Ranque, Agnès Vinet, Abdoulaye Samb, Nicolas Guillot, and Philippe Connes*
